# Supplementary material for: FIT for FUNCTION: study protocol for a randomized controlled trial
Source: PubMed Central journal article supplement (PMC5769391; doi:10.1186/s13063-017-2416-3), 2018-01-15
Supplement: 13063_2017_2416_MOESM3_ESM.pdf [file 13063_2017_2416_MOESM3_ESM.pdf]

**Additional file 3:** International Classification of Functioning, Disability and Health as applied to Fit for Function

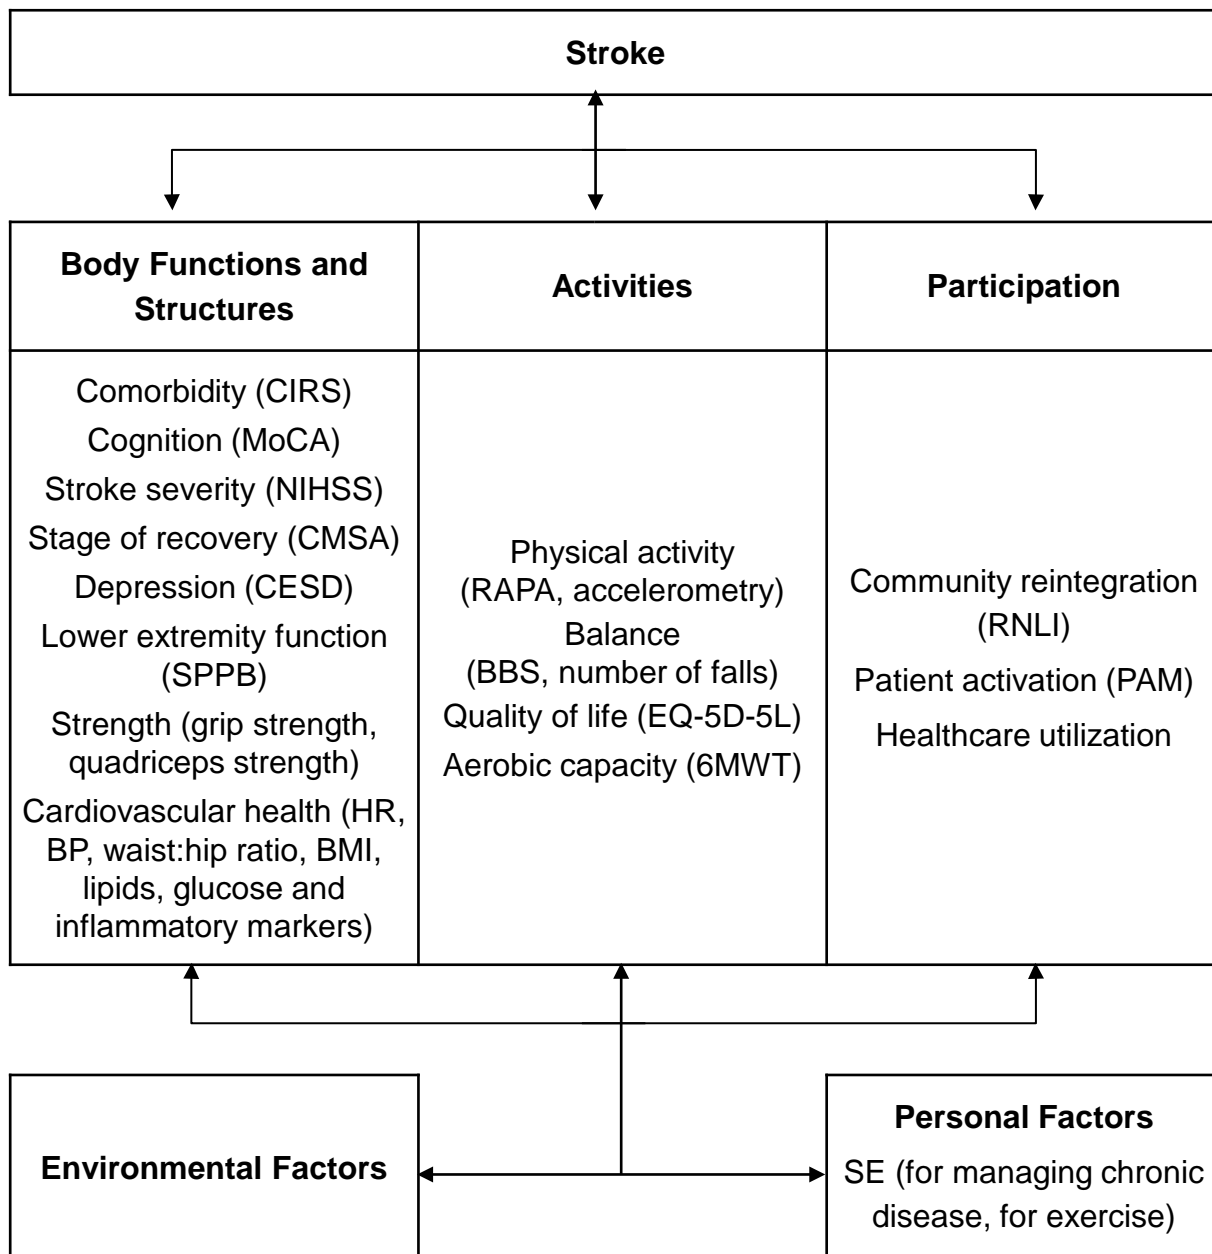

**Legend:** CIRS: Cumulative Illness Rating Scale; MoCA: Montreal Cognitive Assessment; NIHSS: NIH Stroke Scale; CMSA: Chedoke-McMaster Stroke Assessment; CESD: Centre for Epidemiologic Studies Depression Scale; SPPB: Short Physical Performance Battery; HR: Heart rate; BP: Blood pressure; BMI: Body-mass index; RAPAs: Rapid Assessment of Physical Activity; BBS: Berg Balance Scale; EQ-5D-5L: European Quality of Life 5-Dimension Questionnaire; 6MWT: 6-Minute Walk Test; RNLI: Reintegration to Normal Living Index; PAM: Patient Activation Measure; SE: Self-efficacy.
